# Supplementary material
Source: MDPI journal article supplement (https://www.mdpi.com/2073-445X/10/5/501)
Supplement: s1 [file s1 › land-1166460-supplementary.pdf]

Supporting Online Material for

**Ecosystem Services Changes on Farmland in Response to Urbanization in the Guangdong–Hong Kong–Macao Greater Bay Area of China**

Xuege Wang, Fengqin Yan, Yinwei Zeng, Ming Chen, Bin He, Lu Kang, Fenzhen Su \*

\*To whom correspondence should be addressed. E-mail: [sufz@lreis.ac.cn](mailto:sufz@lreis.ac.cn)

**This word file includes**

Table S1 and Figure S1

**Supplementary Table. 1** ESV changes of the farmland in the GBA from 1980 to 2018 (million yuan)

|                 | 1980-1990      | 1990-2000   | 2000-2010      | 2010-2018      |
|-----------------|----------------|-------------|----------------|----------------|
| Dry land        | -506.7         | 149.9       | -2525.0        | -410.2         |
| Paddy field     | -2302.4        | -131.1      | -5250.7        | -715.3         |
| <b>Farmland</b> | <b>-2809.0</b> | <b>18.8</b> | <b>-7775.6</b> | <b>-1125.5</b> |

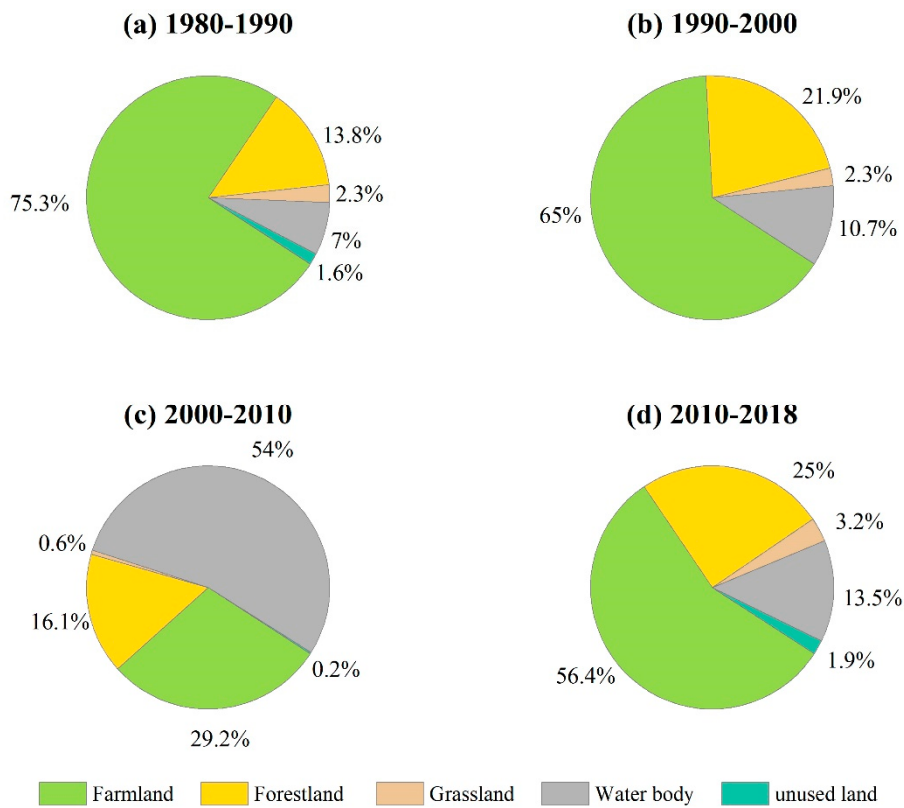

**Supplementary Figure. 1** Conversion percentages of the different land use types into construction land in the GBA from 1980 to 2018. From 1980-1990 and 1990-2000, farmland was the dominant land use type that was converted into construction land, with conversion percentages of 75.3% and 65%, respectively. From 2000-2010, the contribution of farmland to construction land was relatively small with 29.2%, only less than water body. From 2010 to 2018, the conversion from farmland into construction land was the highest with 56.4%. In other words, farmland made significant contributions for urbanization during the past four decades.
